# Supplementary material for: MYADM regulates Rac1 targeting to ordered membranes required for cell spreading and migration
Source: PubMed Central journal article supplement — Mol Biol Cell. 2011 Apr 15;22(8):1252–62. doi: 10.1091/mbc.E10-11-0910 (PMC3078064; doi:10.1091/mbc.e10-11-0910), 2011-04-15
Supplement: E10-11-0910_1.pdf [file E10-11-0910_1.pdf]

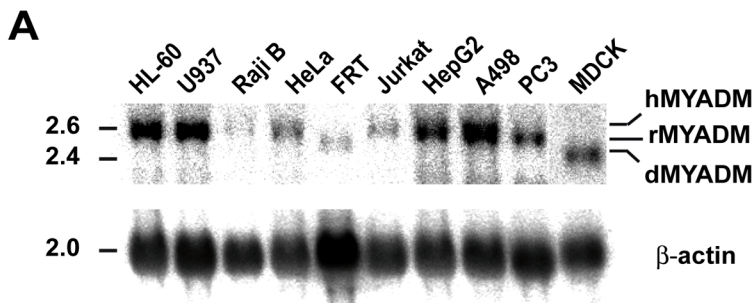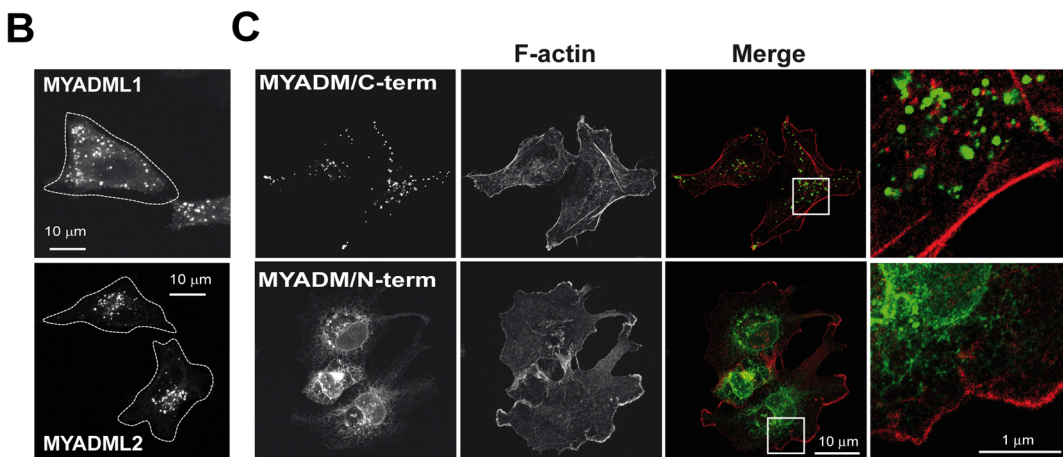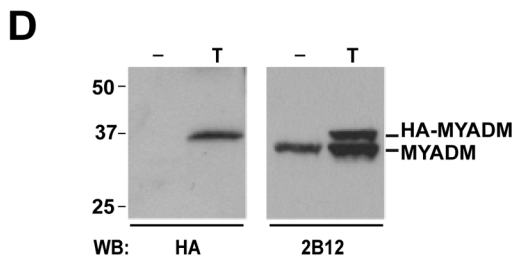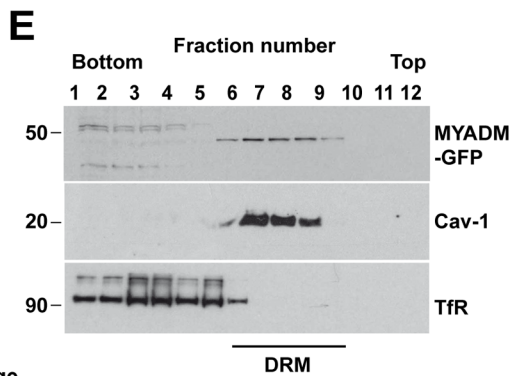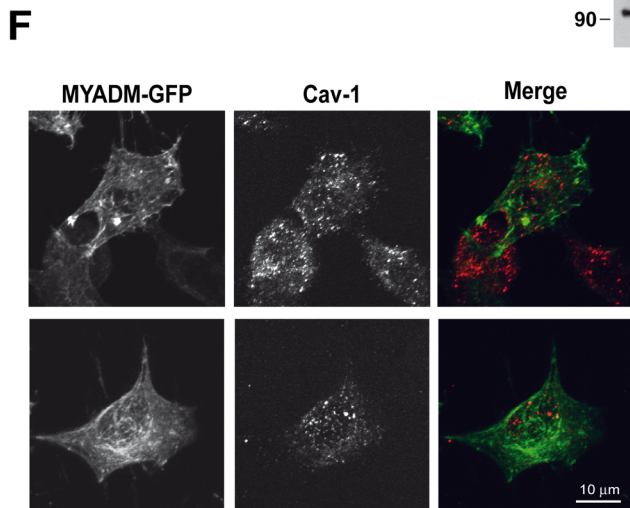

Figure S1

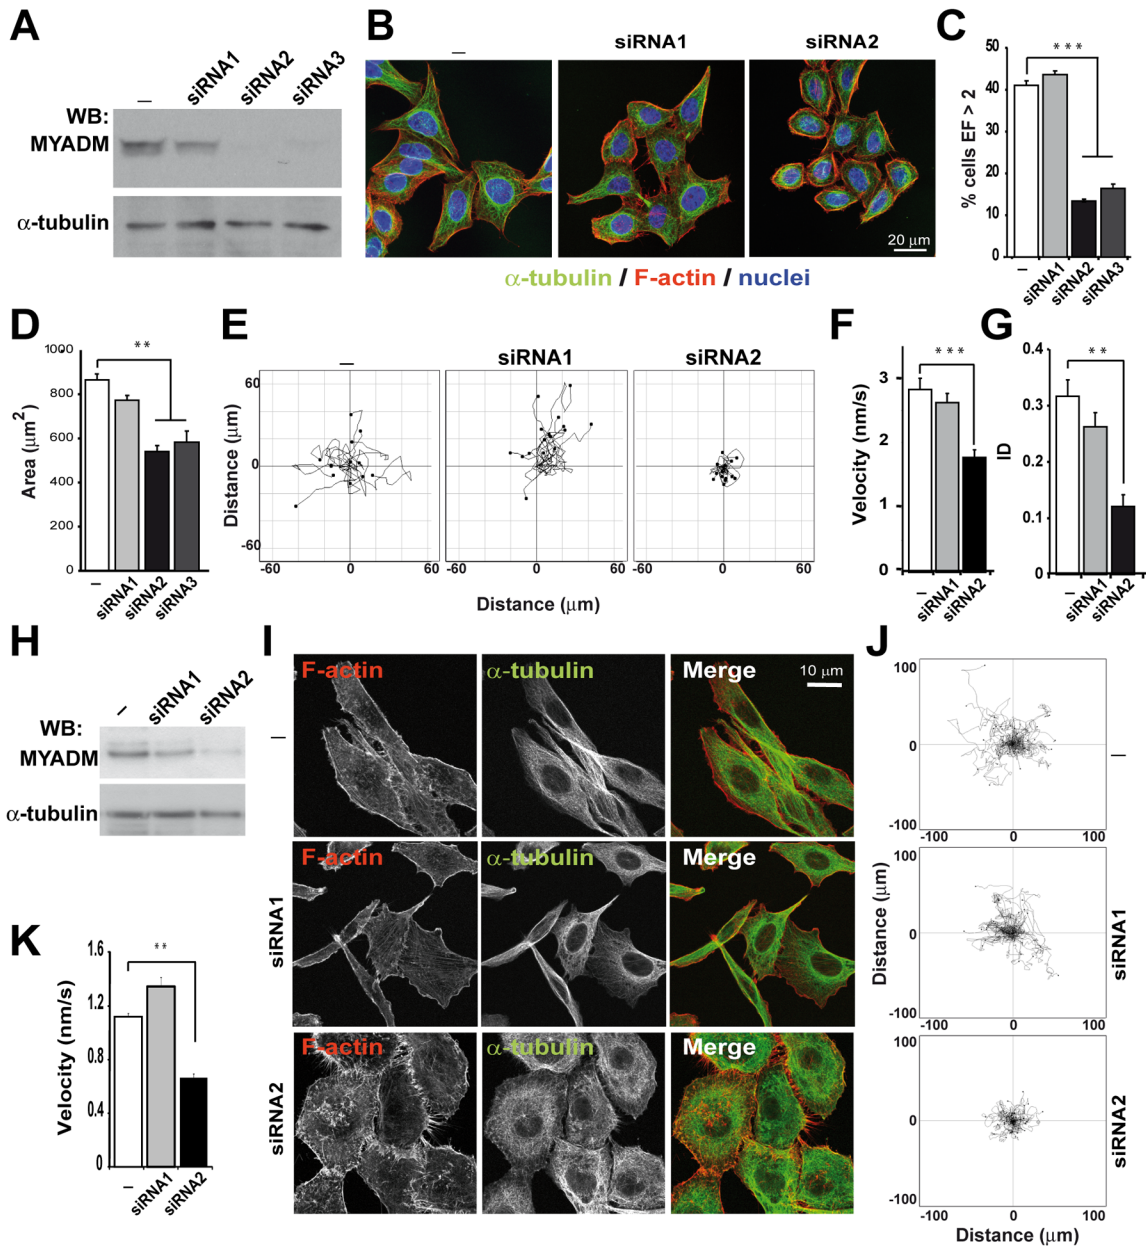

Figure S2

## Legends to Supplemental Figures

**Figure S1.** Characterization and expression of MYADM. **(A)** Expression of the MYADM gene in various cell lines. Total RNA was hybridized to cDNA probes specific to MYADM or  $\beta$ -actin. FRT and MDCK cells are of rat and dog origin, respectively. The rest of the cell lines in the panel are of human origin. The positions of the h (human), r (rat) and d (dog) MYADM mRNA species are indicated. **(B)** Constructs expressing GFP fusions of MYADML1 and MYADML2-GFP were transiently expressed in Cos-7 cells and analyzed by confocal microscopy. Dotted lines indicate the cell contour. **(C)** Cos-7 cells were transfected with constructs encoding HA-tagged forms of either the C-terminal (MYADM/C-term) or the N-terminal (MYADM/N-term) halves of the MYADM molecule and stained with anti-HA antibodies to detect the MYADM fragments and with fluorescent phalloidin to visualize F-actin. An enlargement of the boxed regions is shown in the right panels. **(D)** Characterization of a novel mAb to MYADM. Extracts from untransfected (-) or transfected (T) Cos-7 cells transiently expressing human MYADM tagged with the HA epitope were subjected to immunoblot analysis with either mAb 2B12 or anti-HA mAb. A protein band corresponding to endogenous MYADM was observed in the two extracts immunoblotted with mAb 2B12. **(E)** HeLa cells stably expressing MYADM-GFP were extracted with 1% Triton X-100 at 4°C and centrifuged to equilibrium in sucrose density gradients. Aliquots from each fraction were analyzed by immunoblotting for MYADM (2B12 mAb) and for caveolin-1 (Cav-1) and transferrin receptor (TfR), used as markers of the DRM and soluble fractions, respectively. **(F)** HeLa cells stably expressing MYADM-GFP were stained for caveolin-1. Two images from different fields are shown.

**Figure S2.** Effect of MYADM siRNA expression on cell morphology and migration in HeLa and PC3 cells. **(A)** HeLa cells were transfected with the indicated siRNA and, 48 h later, MYADM levels were analyzed by immunoblot with mAb 2B12. The levels of  $\alpha$ -tubulin were analyzed as a loading control. **(B)** Untransfected (-), siRNA1- and siRNA2-transfected cells were fixed and stained for F-actin,  $\alpha$ -tubulin and nuclei. **(C, D)** Percentage of cells with an elliptical factor (EF) > 2 (C) and spreading area (D). **(E-G)** Untransfected (-), siRNA1- and siRNA2-transfected HeLa cells were analyzed by

time-lapse videomicroscopy. The trajectories of 12-16 cells were tracked (E). The velocity of the cells (F) and their index of directionality (G) were determined. (H-K) PC3 cells were transfected with the indicated siRNA and 48 h later analyzed by immunoblotting with anti-MYADM mAb 2B12 or anti- $\alpha$ -tubulin antibodies (H), or stained for F-actin and  $\alpha$ -tubulin (I), or examined in random migration assays (J, K). The velocity of the cells is shown (K). The trajectories of 23-34 cells per condition are presented in (J). The mean  $\pm$  SEM from three independent experiments are presented in (C, D, F, G, K); \*\*,  $p < 0.01$ ; \*\*\*,  $p < 0.001$ .
